# Supplementary material for: Identification of SARS-CoV-2 Spike Palmitoylation Inhibitors That Results in Release of Attenuated Virus with Reduced Infectivity
Source: MDPI journal article supplement (doi:10.3390/v14030531), 2022-03-04
Supplement: s1 [file s1]

## Supplementary Materials

### **Identification of SARS-CoV-2 spike palmitoylation inhibitors that results in release of attenuated virus with reduced infectivity**

Ahmed A. Ramadan<sup>1</sup>, Karthick Mayilsamy<sup>1,3</sup>, Andrew R. McGill<sup>1,2,3</sup>, Anandita Ghosh<sup>1</sup>, Marc A. Giulianotti<sup>4</sup>, Haley M. Donow<sup>4</sup>, Shyam S. Mohapatra<sup>1,2,3</sup>, Subhra Mohapatra<sup>1,3</sup>, Bala Chandran<sup>1</sup>,  
Robert J. Deschenes\*<sup>1</sup>, Arunava Roy\*<sup>1</sup>

<sup>1</sup>Department of Molecular Medicine, University of South Florida, Tampa, FL 33612.

<sup>2</sup>Department of Internal Medicine, University of South Florida, Tampa, FL 33612.

<sup>3</sup>Department of Veterans Affairs, James A Haley Veterans Hospital, Tampa, FL, 33612.

<sup>4</sup>Center for Translational Science, Florida International University, Port St. Lucie, FL 34987

Figure S1

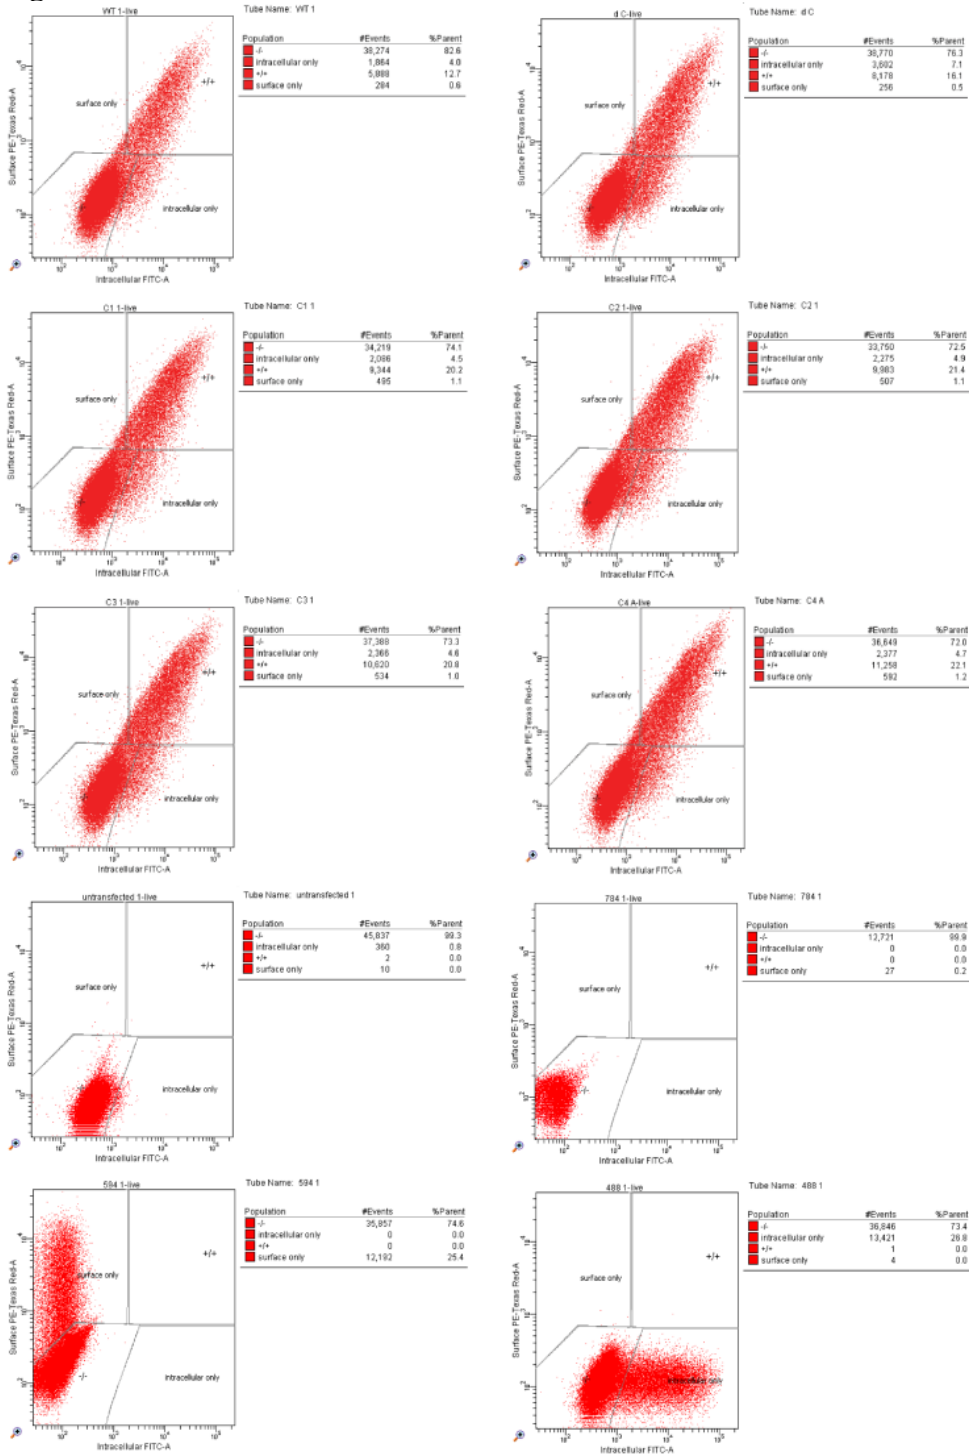

Supplemental image to Fig. 2B. Images of the Flow gates for the Spike-WT and its mutants in addition to the corresponding controls and fluorophore compensations.

**Figure S2**

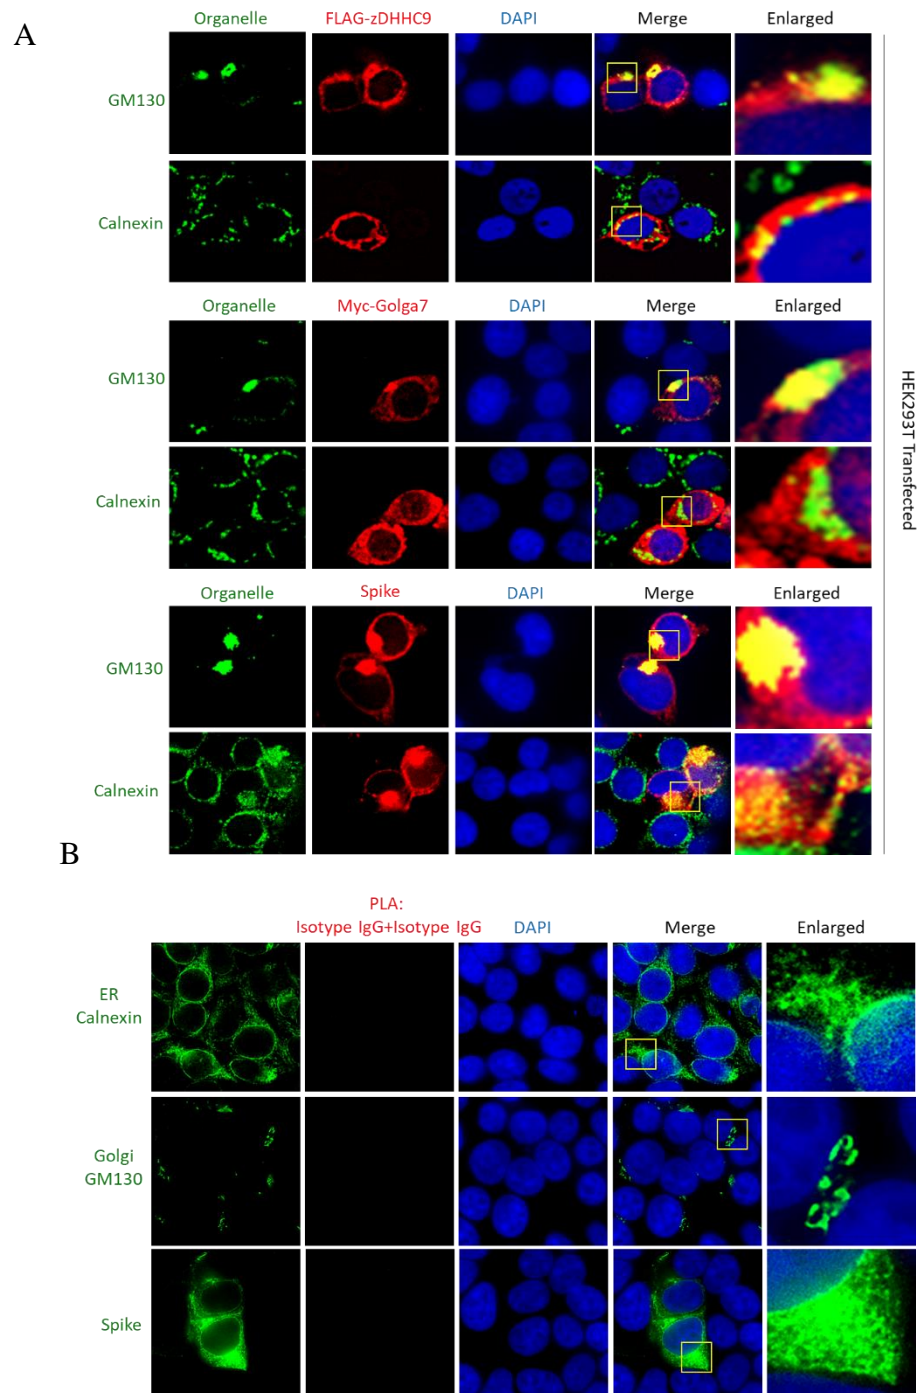

**A.** Co-localization of FLAG-DHHC9, Myc-Golga7 and S protein with the cis-Golgi marker, GM130 or the endoplasmic reticulum marker, Calnexin. HEK293T2 cells were transfected with the indicated plasmids and 72 h later, immunostained for the indicated proteins. **B.** Control PLA with isotype IgGs showing absence of non-specific PLA signal.

**Figure S3**

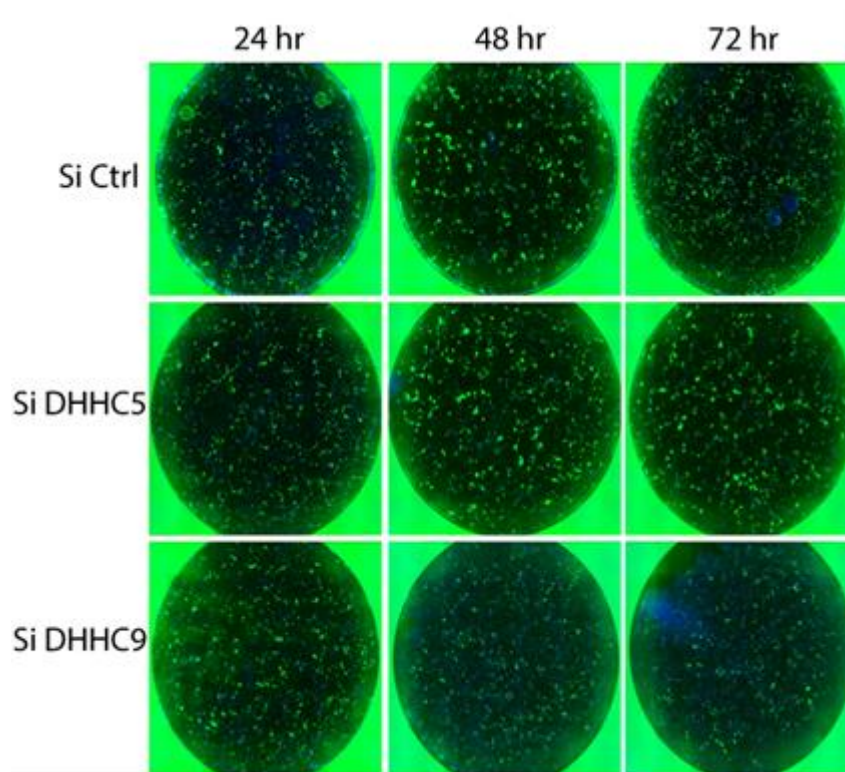

Supplemental image to Fig. 6A. Images of the entire well of the 96 well plate is provided to forego any bias in the region of interest (ROI) photographed.

**Figure S4**

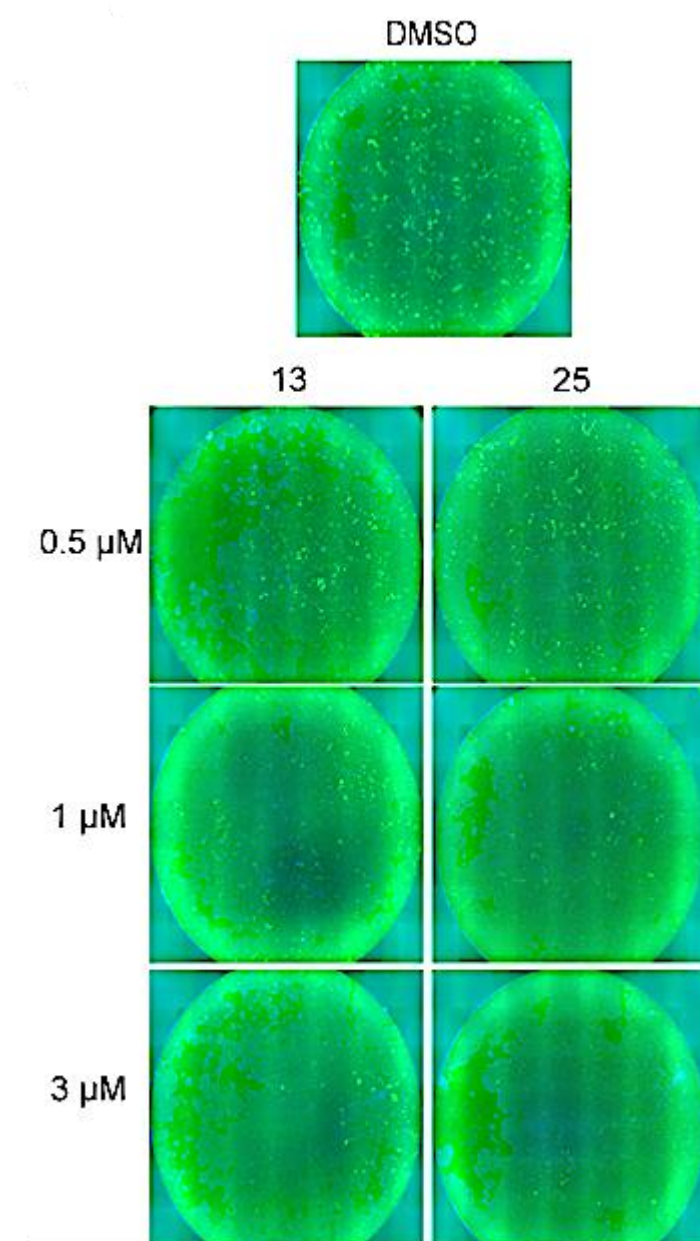

Supplemental image to Fig. 8A. Images of the entire well of the 96 well plate is provided to forego any bias in the ROI photographed.
